# Supplementary material for: Identification of biomarkers and drug repurposing candidates based on an immune-, inflammation- and membranous glomerulonephritis-associated triplets network for membranous glomerulonephritis
Source: BMC Med Genomics. 2020 Jan 7;13:5. doi: 10.1186/s12920-019-0655-8 (PMC6947948; doi:10.1186/s12920-019-0655-8)
Supplement: Supplementary file 3 — Additional file 3: Table S3. Scores of dysregulated IMMATs for MGN [file 12920_2019_655_MOESM3_ESM.xlsx]

## Sheet: Sheet1
Table S3: Scores of dyregulated IMMATs for MGN.
MGN	inflammation	immune	Scoredif	Scoredif	Scorerank	Ppermutation
JAK3	CD40	IL4R	0.527561	0.284086	0.149873	0
JAK3	IL4R	INPP5D	0.497328	0.685331	0.340834	0
JAK3	IL4R	CD40	0.527561	0.284086	0.149873	0
PECAM1	LYN	INPP5D	0.395368	0.362531	0.143333	0
PECAM1	HCK	INPP5D	0.288874	0.748199	0.216135	0
PECAM1	HCK	PLCG1	0.338559	0.395629	0.133944	0.002
JAK3	IL4R	PTPN6	0.570792	-0.00905595	0.00516906	0.003
CDKN1B	AKT1	SRC	0.542038	-0.00219545	0.00119001	0.005
JAK3	IL4R	IL2RG	0.408817	0.258285	0.105591	0.005
HRAS	PRKCZ	IRAK1	0.00112641	1.12105	0.00126276	0.007
YWHAZ	AKT1	TSC1	0.485453	0.087476	0.0424655	0.007
JAK3	IL4R	FES	0.41119	0.109937	0.0452049	0.01
JAK3	JAK2	PTPN6	0.502106	0.0104437	0.00524384	0.016
PRKCD	NFE2L2	CREBBP	0.28678	0.0591764	0.0169706	0.017
YWHAZ	MAPKAPK2	AKT1	0.325228	0.0623486	0.0202775	0.019
JAK3	SOCS3	CXCR4	0.1762	0.310149	0.0546483	0.02
JAK3	IL4R	JAK2	0.413869	0.0266932	0.0110475	0.02
PECAM1	LYN	CSK	0.453358	0.000991836	0.000449657	0.02
JAK3	JAK2	SOCS1	0.259981	0.0579097	0.0150554	0.024
JAK3	JAK2	IL4R	0.413869	0.0266932	0.0110475	0.024
PECAM1	LYN	PTPN6	0.45377	0.00803311	0.00364519	0.024
JAK3	CXCR4	SOCS3	0.1762	0.310149	0.0546483	0.025
PRKCD	IL6ST	PTPN6	0.0490194	0.359034	0.0175996	0.025
JAK3	CXCR4	PTPN6	0.357839	0.0464313	0.016615	0.026
JAK3	JAK2	FES	0.361709	0.0322639	0.0116701	0.027
YWHAZ	AKT1	MAPKAPK2	0.325228	0.0623486	0.0202775	0.028
PRKCB	CHUK	IKBKB	0.523979	-0.127774	0.0669507	0.029
TNF	TNFRSF1B	TRAF2	0.291051	0.0859601	0.0250188	0.03
HRAS	PIK3CD	PIK3R1	0.0083327	0.604118	0.00503393	0.031
YWHAZ	TBXA2R	RAF1	0.432302	0.0206815	0.00894066	0.032
TNF	TNFRSF1A	TRAF2	0.335726	0.0421491	0.0141505	0.032
PRKCB	IKBKB	CHUK	0.523979	-0.127774	0.0669507	0.036
PRKCD	STAT3	LCK	0.12072	0.204028	0.0246304	0.039
YWHAZ	EGFR	CBL	0.260004	0.160241	0.0416633	0.04
PECAM1	LYN	PLCG1	0.463368	-0.340869	0.157948	0.043
JAK3	JAK2	PTK2B	0.41547	0.0085588	0.00355592	0.044
YWHAZ	AKT1	MST1R	0.327175	0.0346277	0.0113293	0.046
CFH	C3	CFI	0.000578902	0.74468	0.000431097	0.049
PRKCD	LYN	PTK2B	0.21714	0.0208536	0.00452816	0.049
PRKCD	STAT3	CREBBP	0.190595	0.0385527	0.00734795	0.049
PRKCD	PIK3CA	LCK	0.0354035	0.238418	0.00844082	0.049
JAK3	STAT3	PTK2B	0.258424	0.0416759	0.01077	0.05
PRKCA	EGFR	PLD2	0.277038	0.0454115	0.0125807	0.05
HRAS	PRKCZ	RAF1	0.0266529	0.419668	0.0111854	0.05
